# Supplementary material for: C3N4 anchored ZIF 8 composites: photo-regenerable, high capacity sorbents as adsorptive photocatalysts for the effective removal of tetracycline from water
Source: Royal Society of Chemistry journal article supplement (doi:10.1039/c7cy00348j), 2017-01-01
Supplement: c7cy00348j1.pdf [file c7cy00348j1.pdf]

## C<sub>3</sub>N<sub>4</sub> anchored ZIF 8 composites: Photo-regenerable, high capacity sorbents as adsorptive photocatalysts for the effective removal of tetracycline from water

Suyana Panneri <sup>[a] [b]</sup>, Minju Thomas <sup>[a] [b]</sup>, Priyanka Ganguly <sup>[a]</sup>, Balagopal N. Nair <sup>[c] [d]</sup>, Abdul Azeez Peer Mohamed <sup>[a]</sup>, K.G.K. Warriar <sup>[a]</sup> and U. S. Hareesh <sup>\*[a] [b]</sup>

<sup>[a]</sup>Materials Science and Technology Division, National Institute for Interdisciplinary Science and Technology (CSIR-NIIST), Thiruvananthapuram - 695019, India

<sup>[b]</sup>Academy of Scientific and Innovative Research (AcSIR), New Delhi, India

<sup>[c]</sup>R&D Center, Noritake Co. Limited, Aichi 470-0293, Japan

<sup>[d]</sup>Nanochemistry Research Institute, Department of Chemistry, Curtin University, GPO Box UI987, Perth, WA 6845, Australia

**Table S1:** Reported works on ZIF-8 based composite photocatalysts

| <b>ZIF-8 based composites with other semiconductor</b> |                                  |       |                                                  |     |
|--------------------------------------------------------|----------------------------------|-------|--------------------------------------------------|-----|
| Sample Name                                            | Semiconductor                    | MOF   | Application                                      | Ref |
| Pt/ZIF-8 loaded TiO <sub>2</sub> nanotubes             | TiO <sub>2</sub>                 | ZIF-8 | Phenol degradation                               | 1   |
| ZIF-8/Zn <sub>2</sub> GeO <sub>4</sub>                 | Zn <sub>2</sub> GeO <sub>4</sub> | ZIF-8 | CO <sub>2</sub> conversion to CH <sub>3</sub> OH | 2   |
| Ag/AgCl@ZIF-8                                          | Ag/AgCl                          | ZIF-8 | Rhodamine B degradation                          | 3   |
| TiO <sub>2</sub> @ZIF-8                                | TiO <sub>2</sub>                 | ZIF-8 | Rhodamine B and methylene blue degradation       | 4   |
| TiO <sub>2</sub> /ZIF-8                                | TiO <sub>2</sub>                 | ZIF-8 | Rhodamine B degradation                          |     |
| ZnO@ZIF-8                                              | ZnO                              | ZIF-8 | Cr and Methylene blue degradation                | 5   |

**Table S2:** Reported works on C<sub>3</sub>N<sub>4</sub> based composite photocatalysts

| <b>C<sub>3</sub>N<sub>4</sub> based composites with other MOF</b> |                                 |             |                                          |     |
|-------------------------------------------------------------------|---------------------------------|-------------|------------------------------------------|-----|
| Sample Name                                                       | Semiconductor                   | MOF         | Application                              | Ref |
| UiO-66/ g-C <sub>3</sub> N <sub>4</sub>                           | g-C <sub>3</sub> N <sub>4</sub> | UiO-66      | Photocatalytic H <sub>2</sub> production | 6   |
| C <sub>3</sub> N <sub>4</sub> /MIL-100(Fe)                        | g-C <sub>3</sub> N <sub>4</sub> | MIL100 (Fe) | Rhodamine B degradation                  | 7   |
| C <sub>3</sub> N <sub>4</sub> /MIL-125(Ti)                        | g-C <sub>3</sub> N <sub>4</sub> | MIL-125(Ti) | Rhodamine B degradation                  | 8   |

**Table S3.** Different compositions of C<sub>3</sub>N<sub>4</sub>-ZIF-8

| Sl No | Sample | Wt % of C <sub>3</sub> N <sub>4</sub> | Wt % of ZIF-8 |
|-------|--------|---------------------------------------|---------------|
| 1     | ZC0    | 30                                    | 70            |
| 2     | ZC     | 60                                    | 40            |
| 3     | ZC1    | 95                                    | 5             |

## Characterization of materials

Composition and thermal stability of the prepared photocatalysts were analyzed by thermogravimetric analysis (Perkin Elmer STA 6000, USA) in the temperature range of 50-800 °C at a heating rate of 5° C/ min in the air atmosphere. The crystal structure and phase purity of the prepared samples were obtained by X-ray diffraction (XRD) using a Philips X'pert Pro diffractometer in the 2θ range of 5-70° using Cu Kα radiation. X-ray photoelectron spectroscopy (XPS) was done on an ESCA + Omicron nanotechnology (Oxford instrument, Germany) spectrometer equipped with a Mg Kα X-ray source (hν = 1253.6 eV). Morphology and microstructure of the prepared samples were investigated by high-resolution transmission electron microscope (HETEM, Technai G<sup>2</sup>, FEI, and The Netherlands) at an accelerating voltage of 300 KV. The elemental composition of the samples was studied using energy dispersive spectrum (EDS) attached to the transmission electron microscope. The SEM micrographs were obtained from scanning electron microscope made by Carl Zeiss, Germany.

The Brunauer- Emmett- Teller (BET) surface area measurements were done by nitrogen adsorption (Micromeritics Tristar 2 USA surface area and porosity analyzer) after degassing at 200° C for 2 hrs. The UV- Visible absorption spectra of the prepared samples were recorded by a Shimadzu UV 2401 PC spectrophotometer in the range of 200- 800 nm and emission spectra were obtained from a spectrofluorometer (Cary Eclipse, Varian, The Netherlands). The prepared materials were also investigated by Fourier Transform Infrared (FT-IR) spectra using a Bruker FT-IR spectrometer for functional group identification. The photoluminescence spectrum was measured using a spectrofluorometer (Cary Eclipse, Varian, Netherlands). The photocatalytic degradations of tetracycline ((TC) were monitored by a UV-visible spectrometer (UV 2401 PC, Shimadzu, Japan) at different time intervals. The zeta potential of the samples was measured by a Zeta potential analyzer (Zetasizer Nano zs90) at different pH values.

### **Adsorption capacity, isotherm, and kinetics of ZC using TC**

The adsorption capacity, isotherm, and kinetics of ZC were predicted using 50-400 µM TC solution. 100 mg/L of photocatalyst was added in different TC concentration and stirred in dark for 60 min. Samples were collected after a regular time interval and the change in TC concentration was measured at 357 nm using a UV-Vis spectrophotometer. The concentration of surface adsorbed TC was calculated using the equation of form;

$$\%TC \text{ adsorbed} = \left( \frac{C_0 - C_t}{C_0} \right) \times 100 \quad \text{Equation (S1)}$$

where  $C_0$  (mg L<sup>-1</sup>) and  $C_t$  (mg L<sup>-1</sup>) correspond to the TC concentration at the start and after contact time  $t$  (min).

The adsorption capacity of the composite was investigated by subjecting them in varying concentration of TC solutions (50 -400 µM). The adsorption capacity,  $q_e$  (mg g<sup>-1</sup>), of TC solution retained per gram of adsorbent at the equilibrium concentration ( $C_e$ ) was calculated using the equation;

$$q_e = \frac{(C_0 - C_e)}{m} \times V \quad \text{Equation (S2)}$$

Where  $C_0$  and  $C_e$  are the initial and equilibrium concentrations of TC in aqueous solution,  $V$  is the solution volume and  $m$  is the amount of adsorbent added.

The adsorption data of 200  $\mu\text{M}$  TC was evaluated using the isotherm models of Langmuir, Freundlich, and Dubinin–Kaganer–Radushkevich (DKR).

Linear form of the Freundlich isotherm model

$$\ln q_e = \left(\frac{1}{n}\right) \ln C_e + \ln K_f \quad \text{Equation (S3)}$$

Where  $K_f$  ( $\text{mg}^{1-1/n} \text{g}^{-1} \text{L}^{1/n}$ ) is the Freundlich constant related to the Gibb's free energy of adsorption and  $n$  ( $\text{gL}^{-1}$ ) is another Freundlich constant related to the adsorption intensity.

Langmuir isotherm model is;

$$\frac{C_e}{q_e} = \frac{1}{q_m} C_e + \frac{1}{q_m \times K_L} \quad \text{Equation (S4)}$$

Where  $q_m$  is the adsorption intensity and  $K_L$  is Langmuir constant.

DKR model is;

$$\ln q_e = \ln q_m - \beta \varepsilon^2 \quad \text{Equation (S5)}$$

Where  $\beta$  ( $\text{mol}^2 \text{J}^{-2}$ ) is constant related to adsorption energy and  $\varepsilon$  is Polanyi potential.

The rate at which the TC is adsorbed from an aqueous solution of the ZC composite is analyzed using different kinetic models. The adsorption data of 100  $\mu\text{M}$  TC fits the pseudo-second order kinetics which can be represented as

$$\frac{t}{q_t} = \left(\frac{1}{q_e}\right) \times t + \frac{1}{K_2 \times q_e^2}$$

Equation (S6)

where  $K_2$  ( $\text{g mg}^{-1} \text{min}^{-1}$ ) is pseudo-second order rate constants and  $q_t$  is the amount of TC adsorbed on the surface per unit mass of adsorbent ( $\text{mg g}^{-1}$ ) at the contact time of  $t$ .

### **Effect of pH and zeta potential**

The effect of pH on adsorption of TC solution ( $200 \mu\text{M}$ ) by ZC composite at different pH ranging from 2-12 was estimated using dilute HCl and NaOH solution. The adsorption experiments were conducted in dark for 60 min and the change in TC concentration was measured at 357 nm using a UV-Vis spectrophotometer. To study the effect of zeta potential on the adsorption of TC using ZC composite was studied. The surface charge of ZC solutions at different pH ranging from 2-12 was estimated.

### **Reusability of ZC**

5 cyclic runs were conducted to check the stability of the prepared bifunctional (adsorption cum photocatalysis) catalyst. In a typical experiment, a weighed amount of catalyst was added in  $200 \mu\text{M}$  TC solution and subjected to adsorption in the dark followed by sunlight-induced photocatalysis. The powder retained was washed with deionized water, dried and used as such for further cyclic runs.

### **Active species trapping**

To ascertain the reactive oxidative species generated in the photocatalytic degradation system, the species trapping experiments were conducted. In a typical experiment 10mM of Isopropanol (IPA) (as a quencher of  $\text{OH}^\cdot$ ), 6mM  $\text{AgNO}_3$  (as a quencher of an electron), 6mM Benzoquinone (BQ) (as a quencher of  $\text{O}_2^\cdot$ ) and 10mM Triethanolamine (TEA) (as a quencher of holes) were respectively added in the photocatalytic system and irradiated under sunlight. The change in TC concentration at 357 nm was investigated using a UV-Vis spectrophotometer.

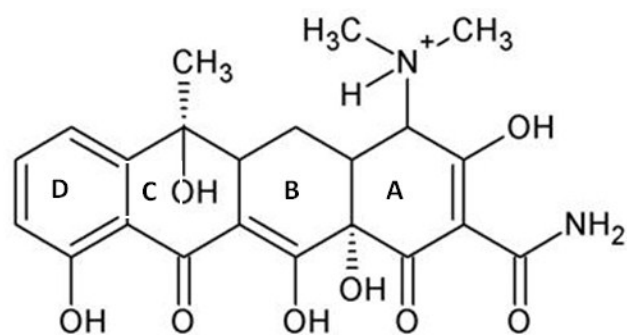

**Fig. S1** Tetracycline (TC) molecule

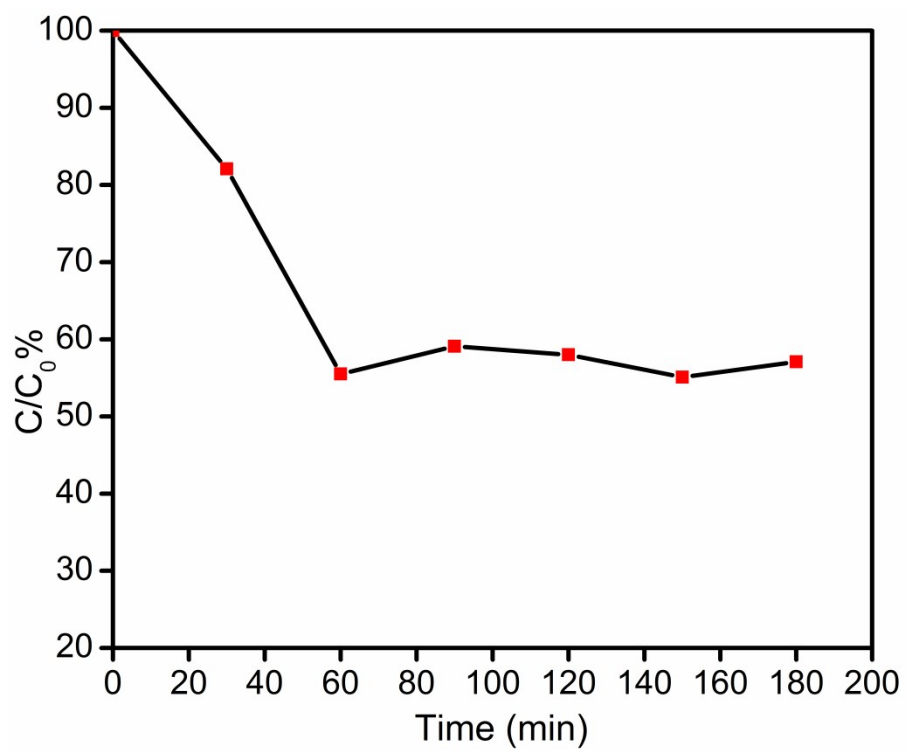

**Fig. S2** Adsorption of TC using C<sub>3</sub>N<sub>4</sub>-ZIF-8 (ZC) composite in dark

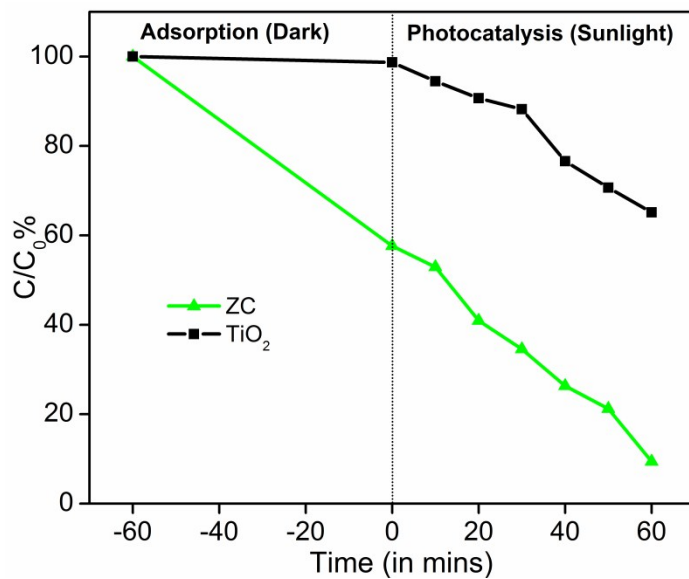

**Fig. S3** Photocatalytic degradation profile of TC using ZC and Degussa TiO<sub>2</sub>

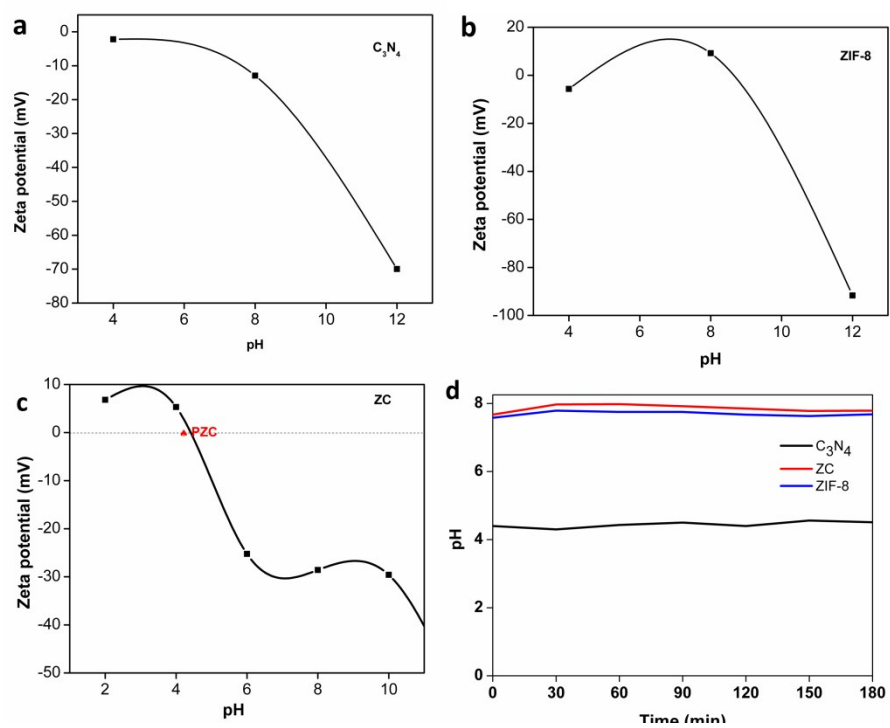

**Fig. S4** Zeta potential curves of a) C<sub>3</sub>N<sub>4</sub> b) ZIF-8 and c) ZC; d) the pH values with time of all the three samples in 200 micromolar aqueous TC solution

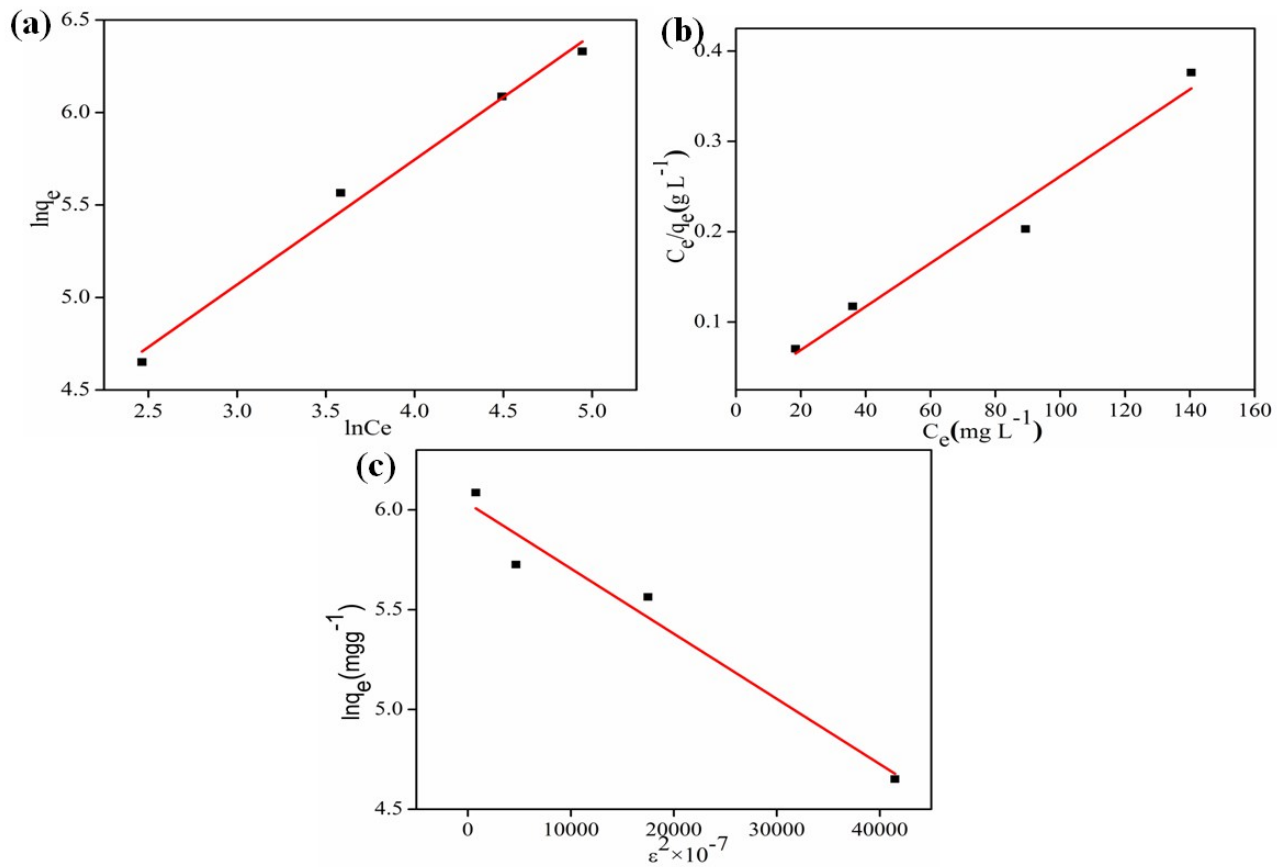

**Fig. S5** (a) Freundlich, (b) Langmuir and (c) Dubinin–Kaganer–Radushkevich (DKR) adsorption isotherms of 200 μM TC adsorption

**Table S4.** Summary of the parameters related to Freundlich isotherm

| Concentration  | 200 μM              |
|----------------|---------------------|
| Isotherm       | Freundlich isotherm |
| R <sup>2</sup> | 0.999               |
| 1/n            | 0.675               |



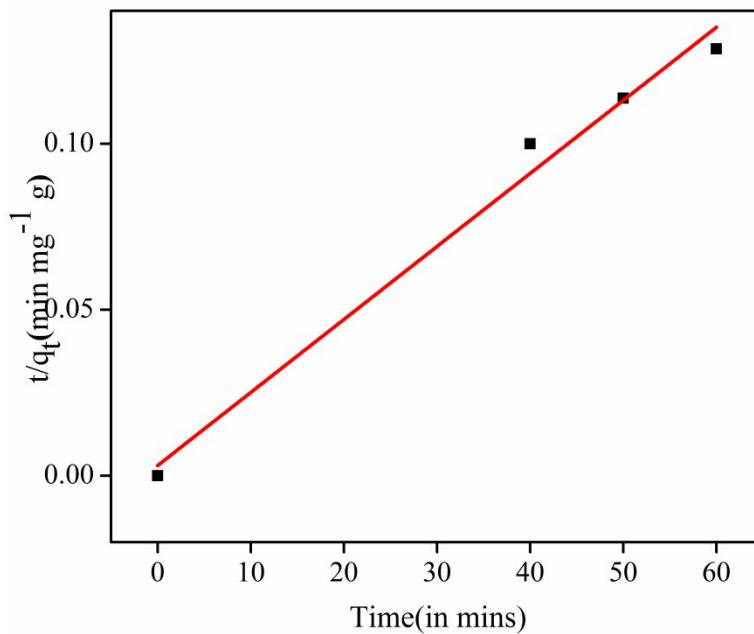

**Fig. S6** Pseudo-second order kinetics of 200  $\mu\text{M}$  TC adsorption

**Table S5:** Summary of the parameters related to pseudo-second order kinetics

|                      |                     |
|----------------------|---------------------|
| Concentration        | 100 $\mu\text{M}$   |
| Kinetics             | Pseudo-second order |
| $R^2$                | 0.989               |
| $K_2$                | 0.0013              |
| $q_e$ (calculated)   | 500                 |
| $q_e$ (experimental) | 420                 |

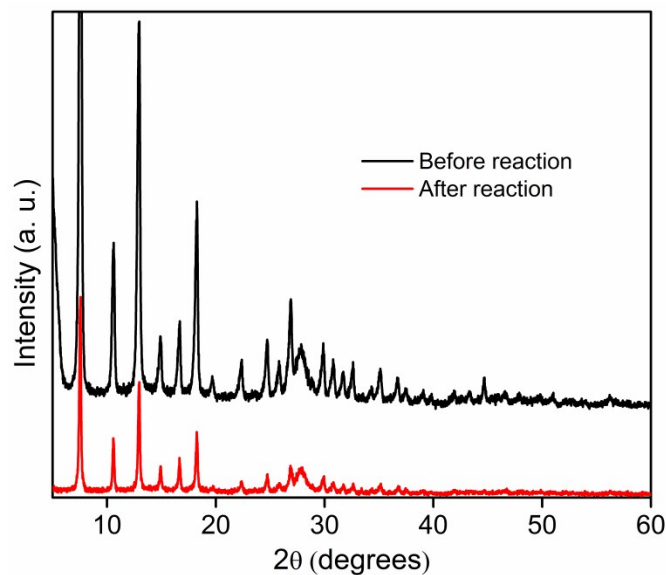

**Fig. S7** XRD pattern of ZC before and after photocatalytic reactions

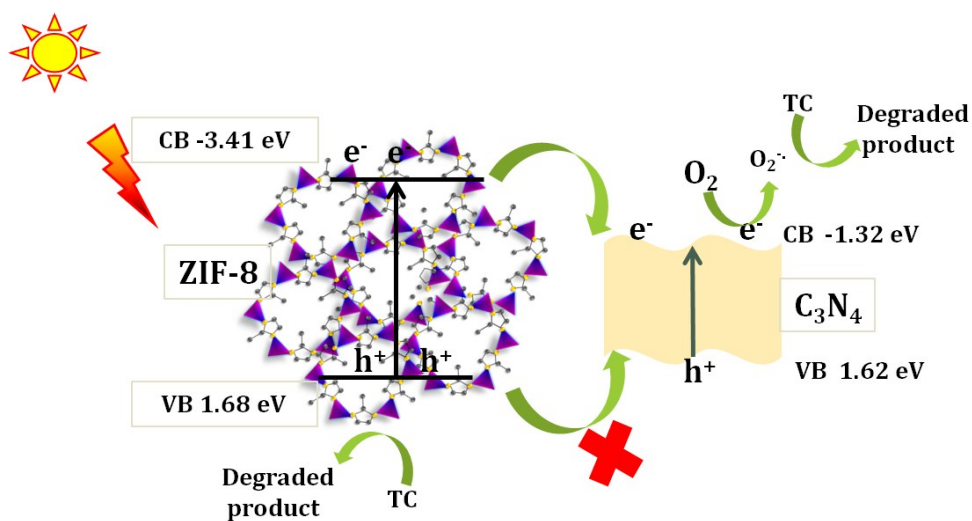

**Fig. S8** Photocatalytic degradation of TC by ZC composite through the formation of Type I heterostructure

## References

1. Isimjan, T. T.; Kazemian, H.; Rohani, S.; Ray, A. K., Photocatalytic activities of Pt/ZIF-8 loaded highly ordered TiO<sub>2</sub> nanotubes. *J. Mater. Chem.* **2010**, *20* (45), 10241-10245.
2. Liu, Q.; Low, Z.-X.; Li, L.; Razmjou, A.; Wang, K.; Yao, J.; Wang, H., ZIF-8/Zn<sub>2</sub>GeO<sub>4</sub> nanorods with an enhanced CO<sub>2</sub> adsorption property in an aqueous medium for photocatalytic synthesis of liquid fuel. *Journal of Materials Chemistry A* **2013**, *1* (38), 11563-11569.

3. Gao, S.-T.; Liu, W.-H.; Shang, N.-Z.; Feng, C.; Wu, Q.-H.; Wang, Z.; Wang, C., Integration of a plasmonic semiconductor with a metal-organic framework: a case of Ag/AgCl@ZIF-8 with enhanced visible light photocatalytic activity. *RSC Advances* **2014**, *4* (106), 61736-61742.
4. Chandra, R.; Mukhopadhyay, S.; Nath, M., TiO<sub>2</sub>@ZIF-8: A novel approach of modifying micro-environment for enhanced photo-catalytic dye degradation and high usability of TiO<sub>2</sub> nanoparticles. *Mater. Lett.* **2016**, *164*, 571-574.
5. Zeng, X.; Huang, L.; Wang, C.; Wang, J.; Li, J.; Luo, X., Sonocrystallization of ZIF-8 on Electrostatic Spinning TiO<sub>2</sub> Nanofibers Surface with Enhanced Photocatalysis Property through Synergistic Effect. *ACS Applied Materials & Interfaces* **2016**, *8* (31), 20274-20282.
6. Wang, R.; Gu, L.; Zhou, J.; Liu, X.; Teng, F.; Li, C.; Shen, Y.; Yuan, Y., Quasi-Polymeric Metal–Organic Framework UiO-66/g-C<sub>3</sub>N<sub>4</sub> Heterojunctions for Enhanced Photocatalytic Hydrogen Evolution under Visible Light Irradiation. *Advanced Materials Interfaces* **2015**, *2* (10), n/a-n/a.
7. Hong, J.; Chen, C.; Bedoya, F. E.; Kelsall, G. H.; O'Hare, D.; Petit, C., Carbon nitride nanosheet/metal-organic framework nanocomposites with synergistic photocatalytic activities. *Catalysis Science & Technology* **2016**, *6* (13), 5042-5051.
8. Wang, H.; Yuan, X.; Wu, Y.; Zeng, G.; Chen, X.; Leng, L.; Li, H., Synthesis and applications of novel graphitic carbon nitride/metal-organic frameworks mesoporous photocatalyst for dyes removal. *Applied Catalysis B: Environmental* **2015**, *174–175*, 445-454.
